# Supplementary material for: MNK-driven eIF4E phosphorylation regulates the fibrogenic transformation of mesenchymal cells and chronic lung allograft dysfunction
Source: JCI journal article supplement (doi:10.1172/jci168393), 2024-08-14
Supplement: sd1 [file 1]

SUPPLEMENTAL FIGURE 1

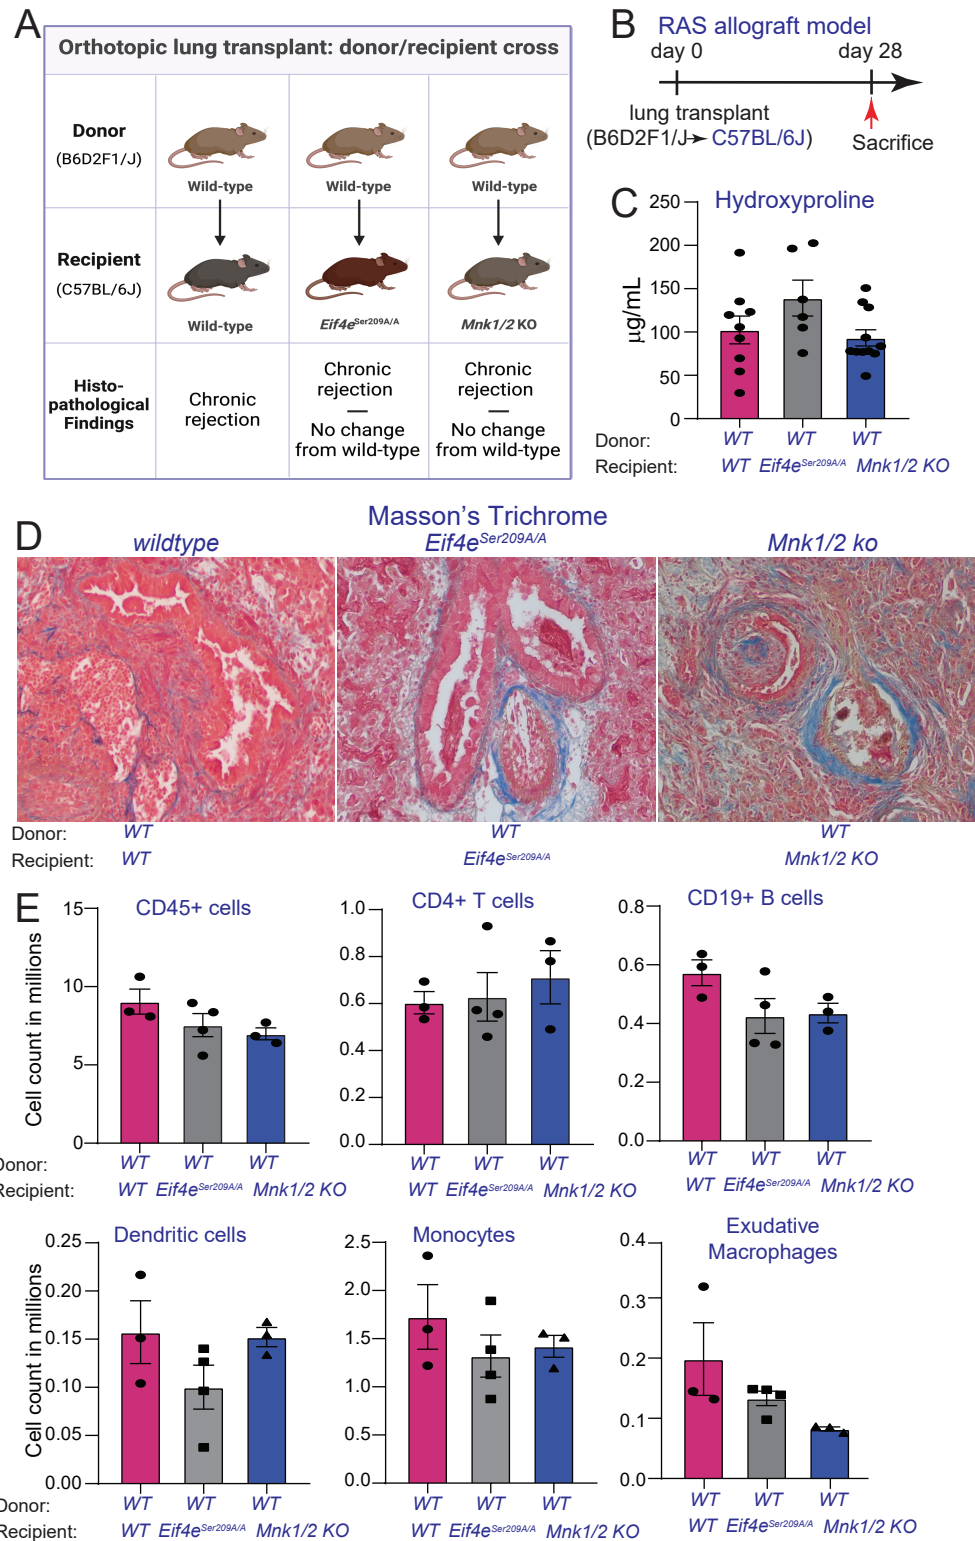

Supplemental Figure 1. **Genetically deficient *Eif4e*<sup>Ser209A/A</sup> and *Mnk1/2* lung transplant recipients demonstrate lack of protection from allograft fibrosis.** Contribution of *Mnk1/2*/eIF4E signaling axis in the hematopoietic compartment to allograft fibrogenesis was investigated by utilizing *Eif4e*<sup>Ser209A/A</sup> and *Mnk1/2* knockout mice as recipients in the B6D2F1/J to C57BL/6J murine lung transplant model. Experimental outcomes and schematic representation shown in (A,B). Fibrosis was assessed by hydroxyproline assay and Masson's trichrome staining (C,D). Infiltrating immune cell populations isolated from collagenase-digested single cell suspensions were subjected to FACS analysis (E). Values are expressed as means ± SEM. Disclosure: Please note that the representative RAS allografts (wildtype) presented in (D) also appears in Figure 6B Masson's Trichrome.
